# Supplementary material
Source: publisher site journal article supplement (https://mbmg.pensoft.net/article/download/suppl/3916256/)
Supplement: Supplementary file 1

**Supplementary Table 5.** Family level taxa (BOLD Data), at 3 minimum read depth:

| Merino Only | Dorper Only | Goat Only | Dorper and Merino | Merino and Goat | Dorper and Goat | Dorper, Merino and Goat |
| --- | --- | --- | --- | --- | --- | --- |
| Cucurbitaceae | Boraginaceae | Malvaceae | Aizoaceae | Casuarinaceae | Geraniaceae | Amaranthaceae |
|  |  |  | Convolvulaceae |  | Goodeniaceae | Asteraceae |
|  |  |  | Plumbaginaceae |  | Marsileaceae | Brassicaceae |
|  |  |  | Solanaceae |  |  | Fabaceae |
|  |  |  |  |  |  | Myrtaceae |
|  |  |  |  |  |  | Poaceae |
